# Supplementary material
Source: PubMed Central journal article supplement (PMC7846583)
Supplement: 41392_2021_478_MOESM1_ESM.pdf [file 41392_2021_478_MOESM1_ESM.pdf]

1  
2  
3  
4  
5  
6  
7  
8  
9

# Supplementary Materials for

## Characterization of SARS-CoV-2 Specific Antibodies in COVID-19 Patients

### Reveals Highly Potent Neutralizing IgA

*This file includes:*

- Materials and Methods
- Figures. S1 to S5
- Tables S1

#### 10 Materials and Methods

##### 11 *Serum Sample preparation*

12 The details of 216 serum samples for antibodies detection from 87 COVID-19 patients were described  
13 before.<sup>3</sup> For serum antibodies purification, this study enrolled a total of 90 mL from 50 cases of  
14 COVID-19 patients admitted to the First Affiliated Hospital of USTC Hospital between Jan 30 and Feb  
15 13, 2020, and their blood samples were collected during routine clinical testing in hospitalization and  
16 after discharged from the hospital. All enrolled cases were confirmed to be infected with SARS-CoV-2  
17 using real time RT-PCR (RT-qPCR) test on throat swab samples from the upper respiratory tract. Final  
18 concentration of a denaturant solution containing 1% TNBP and 1% Triton X-100 was added to the  
19 serum pool. After adequate mixing by inverting, the sample was incubated at 30 °C for 4 hours to  
20 completely inactivate any potential viruses. Such solvent/detergent treatment is recommended by WHO  
21 guidelines on viral inactivation and removal procedures intended to assure the viral safety of human  
22 blood plasma products ([https://www.who.int/bloodproducts/publications/WHO\\_TRS\\_924\\_A4.pdf](https://www.who.int/bloodproducts/publications/WHO_TRS_924_A4.pdf)).

23

##### 24 *Molecular cloning, protein expression and purification*

25 The expression and purification of nucleocapsid protein [(A1-A419) (NCBI accession code:  
26 ADI66791.1)] in *E. coli* was performed as described previously (doi: 10.1016/j.bbrc.2020.04.136.).  
27 Briefly, special treatment during the addition of high salt in lysis buffer and a hydrophobic interaction  
28 column was used to completely remove non-specific nucleic acid contamination. The final protein was  
29 homogeneous and free of nucleic acid contamination as revealed by gel filtration and UV-Vis spectrum.

30 To make recombinant SARS-CoV-2 RBD [(A321-A591) (NCBI accession code: QLI52045)],  
31 SARS-CoV RBD [(A309-A540) (NCBI accession code: YP\_009825051.1)] and hACE2 [(A19-A615)  
32 (NCBI accession code: NP\_001358344.1)], an IFNA1 leader sequence, a sequence encoding receptor  
33 binding domain of spike protein or extracellular domain of ACE2 and a human IgG1-Fc was fused  
34 together in this order and cloned into pTT5 vector. The construct was transiently transfected into  
35 HEK293F cells by polyethylenimine (Polyscience). After three days of expression, fusion protein was  
36 purified from cell supernatant using protein A column (GE Healthcare).

37

##### 38 *Preparation of Antigen immobilized affinity columns*

39 The N protein or RBD protein was coupled to agarose resin (CNBr-activated Sepahrose 4B) according

40 to the manufacturer's protocols (GE Healthcare). Briefly, 1.75 g of lyophilized powder was suspended  
41 in 100 mL of 1 mM HCl and washed using a MACS Mix for 15 min, and the supernatant was removed  
42 after centrifugation. 10 mg of protein was first diluted in 5 mL of coupling buffer (0.1 M NaHCO<sub>3</sub> pH  
43 8.3, 0.5 M NaCl), then added to the well-washed resin. The mixture was incubated by MACS Mix  
44 overnight at 4 °C. The protein-coupled resin was packed into a 5 mL empty column, washed 5 times  
45 with coupling buffer to remove the excess protein and then blocked the active group by loading 0.1 M  
46 Tris-HCl. The packaged columns were ready to be used after alternately washing by acid buffer (0.1 M  
47 acetic acid/sodium acetate pH 4.0, 0.5 M NaCl) and alkaline buffer (0.1 M Tris pH 8.0, 0.5 M NaCl),  
48 respectively.

49

#### 50 ***Purification of IgG, IgM and IgA of N and RBD protein***

51 Ammonium sulfate powder was added to the serum to a final concentration of 3 M. After stirring at  
52 room temperature for 15 min or till completely dissolved, the suspension was centrifuged at 13,000  
53 rpm/min for 30 min at 4 °C to remove the lipids and supernatant. The pellets were re-suspended in 40  
54 mL of PBS and filtered before loading onto an N protein affinity column. The sample was eluted with a  
55 linear gradient of elution buffer (0.1 M HAcO) and further purified by a protein G column with elution  
56 buffer (0.1 M HAcO). Both of the flow-through and elution peak (IgG) from protein G column were  
57 collected. Then the flow-through sample was further purified by an anti-IgM column and the bound  
58 protein was eluted. The flow-through from anti-IgM column was corresponding to IgA while the eluted  
59 peak was corresponding to IgM.

60 The flow-through fraction from the N protein affinity column was loaded onto an RBD-Fc affinity  
61 column and eluted with a linear gradient of elution buffer (0.1 M HAcO). The IgG, IgM and IgA of the  
62 spike protein RBD were then purified using a protein G column and an anti-IgM column following the  
63 same procedure as that of purifying IgG, IgM and IgA of N protein. After purification, all isolated  
64 antibodies were verified by SDS-PAGE and identified by mass spectrum.

65

#### 66 ***Western Blot***

67 The purified antibodies of IgG, IgM, IgA against NP and RBD were boiled in the reduced SDS loading  
68 buffer for 3 min. The supernatant was loaded onto an SDS-PAGE gel along with a molecular weight  
69 marker. The protein was transferred from the PAGE gel to a PVDF membrane (Millipore). The  
70 membrane was incubated in blocking buffer [5% defatted milk (w/v) in TBST (0.1% Tween 20,  
71 150 mM NaCl, 20 mM Tris-HCl pH 7.5)] for 1 h at room temperature. Subsequently, the membrane  
72 was incubated with HRP labeled anti-IgG-Fc (1:5000, Sino Biological)/anti-IgA (1:4000, Boster  
73 Biological)/anti-IgM-μ (1:6000, Boster Biological) secondary antibody in blocking buffer for 1 hr at  
74 room temperature. Lastly, the membrane was washed by TBST again, and detected by ECL kit  
75 (abpbio) using chemiluminescence apparatus (Bio-Rad).

76

#### 77 ***NP and RBD-specific isotype antibodies standard detection using chemiluminescence assay***

78 Purified NP and RBD-specific subtype antibodies were serially diluted using dilution buffer (Kangrun  
79 Bio.tech). Then the diluted antibodies were detected by chemiluminescence instrument (Kangrun  
80 Bio.tech). The data was analyzed by Microsoft Excel software.

81

#### 82 ***Serological test of COVID-19 convalescent patients of NP and RBD-specific subtype antibodies*** 83 ***using chemiluminescence assay***

84 The collected serum samples of COVID-19 patients and were treated as described above. The serum  
85 was diluted 40 times by dilution buffer (Kang Run Biotech) then detected by chemiluminescence  
86 instrument (Kangrun Biotech). The data was analyzed by Prism 5.0.

87

#### 88 ***Antigen-antibody interaction analysis by BLI***

89 Molecular interactions were studied with a ForteBio RED96 system. The N and RBD proteins from  
90 either SARS-CoV-2 or SARS were immobilized to an AR2G sensor chip (FortBio) using an RED96  
91 system (FortBio). AR2G sensor chip was wetted by DPBS for 10 min and then activated for 1500 s by  
92 the mixture of 0.4 M of EDC and 0.1 M NHS (1:1). The N and RBD proteins were diluted into 200  $\mu$ L  
93 of NaAcO buffer (20 mM, pH 3.6 or pH 5.0) to a final concentration of 30  $\mu$ g/mL respectively, then  
94 loaded onto the sensor for a duration of 2000 s to couple onto the sensor. Due to the low coupling  
95 efficiency, N protein was coupled twice. The sensor was washed with aminoethanol buffer (pH 8.5) to  
96 block excessive activated sites. Antibodies were diluted with PBS to 9  $\mu$ g/mL, then flown on to the  
97 sensor. The association and dissociation curves were acquired. Results were analyzed by ForteBio Data  
98 Analysis software and Prism 5.0.

99

#### 100 ***Competitive ELISA***

101 The hACE2-Fc fusion protein was biotinylated by Sulfo-NHS-LC-LC-Biotin (Thermo) overnight at  
102 4 °C. 2  $\mu$ g/mL purified SARS-CoV-2 RBD proteins free of Fc tag was coated in a 96-well immune  
103 plate (Thermo) overnight at 4 °C. The plate was washed by PBS then blocked with PBST containing 5%  
104 defatted milk (w/v) for 2 hr at room temperature. 10 nM biotinylated hACE2-Fc was mixed with  
105 serially diluted RBD-IgA or RBD-IgM or RBD-IgG antibodies (100  $\mu$ g/mL, 50  $\mu$ g/mL, 25  
106  $\mu$ g/mL...0.19  $\mu$ g/mL, 0), and was then added to the plate and incubated for 1 hr at room temperature.  
107 After being washed by PBST (PBS containing 0.1 % Tween-20), the plate was incubated with  
108 HRP-labeled Streptavidin (1:5000, Beyotime) for 30 min. After being washed for 5 times with PBST,  
109 100  $\mu$ L per well TMB (Beyotime) was added and reacted under dark for 10 min. Lastly, 50  $\mu$ L of  
110 H<sub>2</sub>SO<sub>4</sub> (1 M) was added to each well to stop the reaction. OD<sub>450</sub> was read by a Synergy H1 plate reader  
111 (Biotek). The data was analyzed by Prism 5.0.

112

#### 113 ***SARS-CoV-2 neutralization assay***

114 Live SARS-CoV-2 was provided by the Centers for Disease Control and Prevention (CDC) of Anhui  
115 Province and the whole neutralization assays were performed in BSL-3 laboratory. Vero-E6 cells were  
116 seeded in 96-well plates for 1 day before infection when the cell density reached 85%. Ten fold serial  
117 dilutions were made for RBD-IgA, IgM and IgG from concentrations of 88  $\mu$ g/mL, 72  $\mu$ g/mL and  
118 164.7  $\mu$ g/mL, respectively. Each diluted antibody was mixed with an equal volume of SARS-CoV-2 at  
119 a 20 TCID<sub>50</sub>. The mixture was then added to Vero-E6 cells immediately and incubated for 1 hour in  
120 incubator. The cells were washed by PBS and further incubated in DMEM supplemented with 2% of  
121 FBS for 48 hours. The cells were then lysed and the SARS-CoV-2 nucleic acid was extracted by RNA  
122 extraction machine using RNA extraction kits (Tianlong Biotech).

123 Nucleic acid quantification was performed by RT-qPCR with the following primers targeting  
124 nucleocapsid gene: NP-for: 5'-GGG GAA CTT CTC CTG CTA GAA T-3', NP-rev: 5'-CAG ACA TTT  
125 TGC TCT CAA GCT G-3', probe: 5' FAM-TTG CTG CTG CTT GAC AGA TT-TAMRA 3' (Sangong  
126 Biotech). The results were analyzed using Prism 5.0.

127

128 **Figure. S1.**

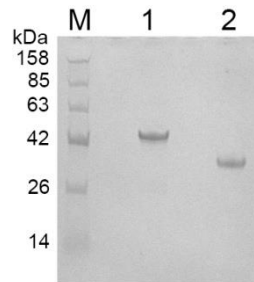

129

130 **Fig. S1. Purification of recombinant SARS-CoV-2 Nucleocapsid protein and RBD.**

131 After SDS-PAGE separation based on molecular weight (kDa) together with protein size markers (M),  
132 the proteins were stained with Coomassie Blue. Predicted molecular mass of NP (1) and RBD (2) are  
133 45.6 kDa and 30.3 kDa, respectively.

134 **Figure. S2.**

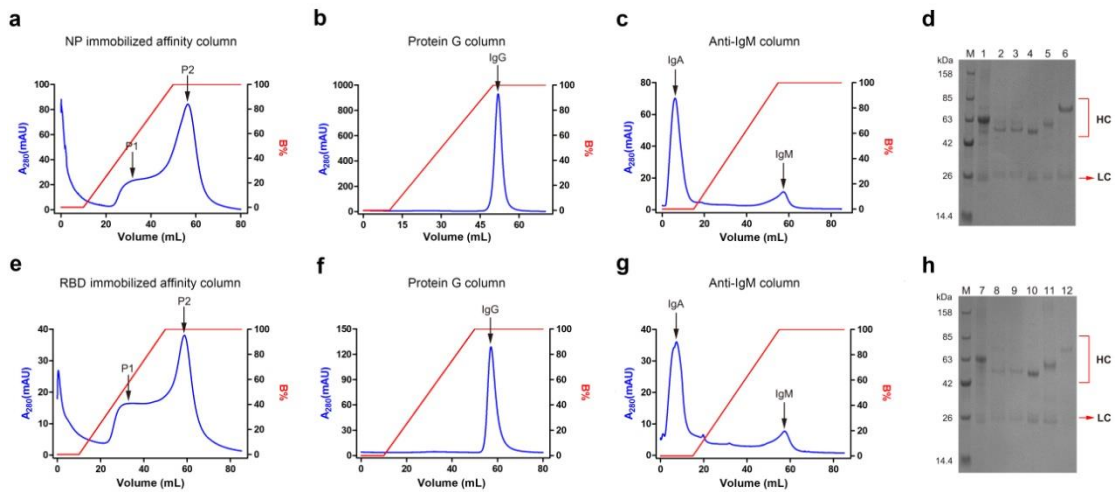

135

136 **Fig. S2. Purification of anti-nucleocapsid and anti-RBD antibodies from convalescent COVID-19**  
137 **patients' serum pool.**

138 90 mL virus-inactivated COVID-19 convalescent patients' serum were loaded into NP-immobilized  
139 column, the NP-specific antibodies were linearly eluted by acetic acid (a). The eluted antibodies were  
140 then applied to protein G column, the NP-IgG were linearly eluted by acetic acid (b). The flowthrough of  
141 protein G column were purified by anti-IgM column, the NP-IgM were linearly eluted by acetic acid (c)  
142 and the flowthrough were NP-IgA. NP-IgA were further purified by anti-IgA beads. The isolated  
143 NP-specific antibodies were verified by SDS-PAGE (d). The RBD-specific antibodies were purified by  
144 RBD-immobilized column from the 90 mL serum (e). The RBD-IgG (f) and RBD-IgM (g) were  
145 isolated by protein G column and anti-IgM column. RBD-IgA were also further purified by anti-IgA  
146 beads. The isolated RBD-specific antibodies were verified by SDS-PAGE (h).

147 M: marker; 1: total protein in serum; 2-3: P1 and P2 purified by NP-immobilized affinity column; 4:

148 IgG purified by Protein G column; 5-6: IgA and IgM purified by anti-IgM column; HC: heavy chain;  
149 LC: light chain.

150 Figure. S3.

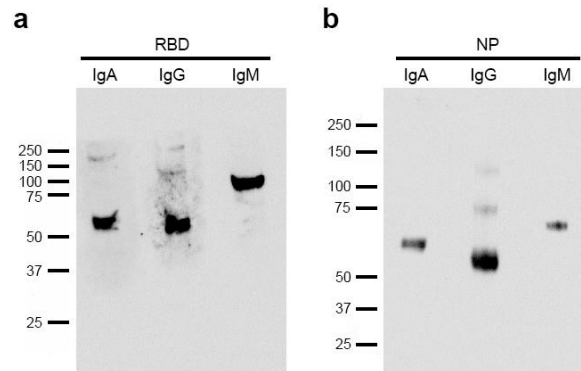

151

152 Fig. S3. Verification of purified antibodies.

153 Purified different isotypes of antibodies were verified by western blotting using HRP-anti-human  
154 IgA-Fc/ IgM- $\mu$  chain/ IgG-Fc secondary antibodies.

155 a The heavy chains of NP-specific antibodies were verified by HRP-conjugated secondary antibodies.

156 b The heavy chains of RBD-specific antibodies were verified by HRP-conjugated secondary  
157 antibodies.

158 Figure. S4.

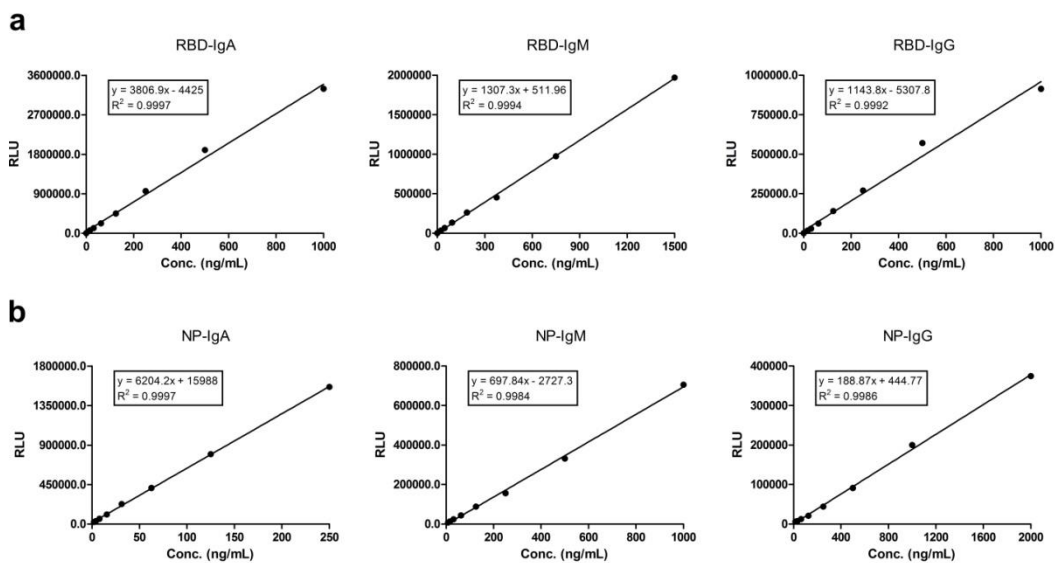

159

160 Fig. S4. Standard curves for RBD- and NP-specific antibodies.

161 a Standard curves were constructed based on immunoassay of 8 concentrations of RBD-specific IgA,  
162 IgM or IgG antibodies.

163 **b** Standard curves were constructed based on immunoassay of 8 concentrations of NP-specific IgA,  
 164 IgM or IgG antibodies.

165 **Figure. S5.**

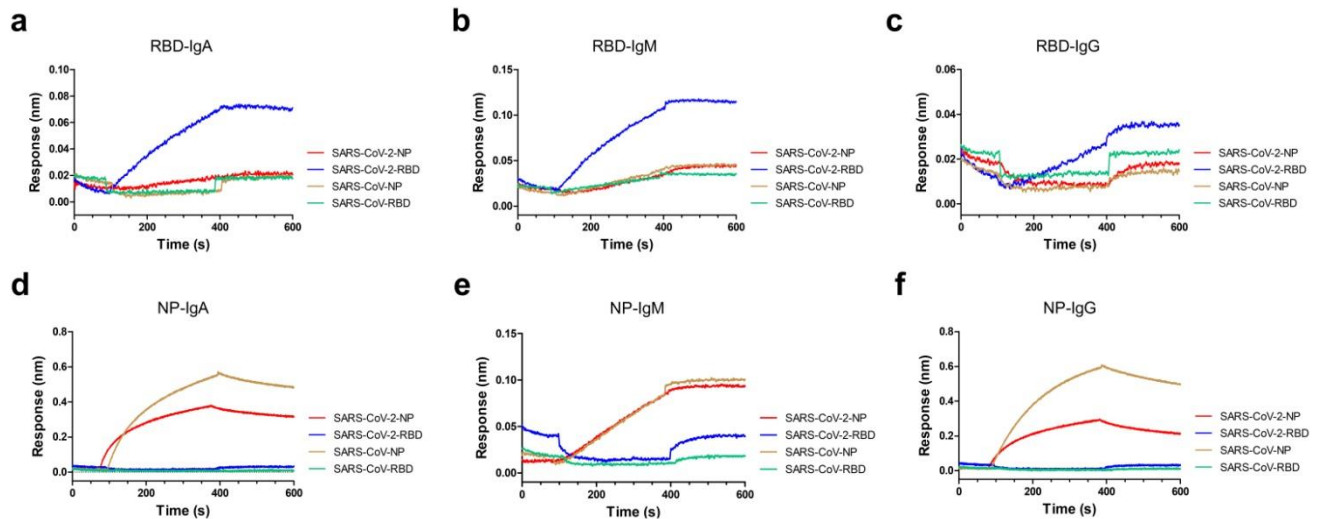

166

167 **Fig. S5. Specificity evaluation of serum antibodies targeting different antigens.**

168 Specific binding profiles of SARS-CoV-2 RBD/ SARS-CoV RBD/ SARS-CoV-2 NP/ SARS-CoV NP  
 169 to RBD-IgA (a), RBD-IgM (b) and RBD-IgG (c), or NP-IgA (d), NP-IgM (e) and NP-IgG (f) by  
 170 ForteBio. The curves fitted by GraphPad Prism 5.0.

171

172 **Table S1.**

173 **Quantity of SARS-CoV-2 antibodies and their affinities**

| Antigen and antibody isotype    | RBD   |      |      | Nucleocapside Protein |       |      |
|---------------------------------|-------|------|------|-----------------------|-------|------|
|                                 | IgA   | IgM  | IgG  | IgA                   | IgM   | IgG  |
| Quantities from 90 mL sera (mg) | 0.736 | 0.11 | 3.62 | 0.895                 | 0.115 | 9.52 |

174
